# Supplementary material for: DeepPheno: Predicting single gene loss-of-function phenotypes using an ontology-aware hierarchical classifier
Source: PubMed Central journal article supplement (PMC7710064; doi:10.1371/journal.pcbi.1008453), 2020-11-18
Supplement: pcbi.1008453.s001.pdf [file pcbi.1008453.s001.pdf]

| Phenotype ID | Phenotype name                                           | $F_{\max}$    |
|--------------|----------------------------------------------------------|---------------|
| HP:0000118   | Phenotypic abnormality                                   | 0.999 ± 0.000 |
| HP:0000005   | Mode of inheritance                                      | 0.961 ± 0.005 |
| HP:0010571   | Elevated levels of phytanic acid                         | 0.960 ± 0.064 |
| HP:0010965   | Abnormal circulating phytanic acid level                 | 0.933 ± 0.107 |
| HP:0010964   | Abnormal circulating long-chain fatty-acid concentration | 0.893 ± 0.128 |
| HP:0008167   | Very long chain fatty acid accumulation                  | 0.893 ± 0.128 |
| HP:0001088   | Brushfield spots                                         | 0.892 ± 0.130 |
| HP:0000707   | Abnormality of the nervous system                        | 0.861 ± 0.008 |
| HP:0012638   | Abnormality of nervous system physiology                 | 0.836 ± 0.008 |
| HP:0003572   | Low plasma citrulline                                    | 0.808 ± 0.154 |
| HP:0003648   | Lacticaciduria                                           | 0.793 ± 0.168 |
| HP:0000007   | Autosomal recessive inheritance                          | 0.778 ± 0.007 |
| HP:0000152   | Abnormality of head or neck                              | 0.767 ± 0.008 |
| HP:0000234   | Abnormality of the head                                  | 0.763 ± 0.010 |
| HP:0000924   | Abnormality of the skeletal system                       | 0.762 ± 0.009 |
| HP:0000478   | Abnormality of the eye                                   | 0.753 ± 0.010 |
| HP:0008316   | Abnormal mitochondria in muscle tissue                   | 0.752 ± 0.089 |
| HP:0011842   | Abnormality of skeletal morphology                       | 0.750 ± 0.012 |
| HP:0012265   | Ciliary dyskinesia                                       | 0.749 ± 0.099 |
| HP:0012262   | Abnormal ciliary motility                                | 0.749 ± 0.099 |
| HP:0012261   | Abnormal respiratory motile cilium physiology            | 0.749 ± 0.099 |
| HP:0003011   | Abnormality of the musculature                           | 0.748 ± 0.007 |
| HP:0012639   | Abnormality of nervous system morphology                 | 0.746 ± 0.006 |
| HP:0012759   | Neurodevelopmental abnormality                           | 0.733 ± 0.015 |
| HP:0000271   | Abnormality of the face                                  | 0.722 ± 0.016 |
| HP:0011965   | Abnormal circulating citrulline concentration            | 0.720 ± 0.112 |
| HP:0002011   | Morphological abnormality of the central nervous system  | 0.717 ± 0.006 |
| HP:0011804   | Abnormal muscle physiology                               | 0.709 ± 0.014 |
| HP:0025031   | Abnormality of the digestive system                      | 0.707 ± 0.015 |
| HP:0032243   | Abnormal tissue metabolite concentration                 | 0.705 ± 0.117 |
| HP:0009121   | Abnormal axial skeleton morphology                       | 0.698 ± 0.009 |
| HP:0000631   | Retinal arterial tortuosity                              | 0.694 ± 0.200 |
| HP:0001939   | Abnormality of metabolism/homeostasis                    | 0.693 ± 0.013 |
| HP:0001626   | Abnormality of the cardiovascular system                 | 0.689 ± 0.014 |
| HP:0012443   | Abnormality of brain morphology                          | 0.686 ± 0.006 |
| HP:0001574   | Abnormality of the integument                            | 0.681 ± 0.016 |
| HP:0005181   | Premature coronary artery atherosclerosis                | 0.673 ± 0.181 |
| HP:0001507   | Growth abnormality                                       | 0.672 ± 0.021 |
| HP:0012373   | Abnormal eye physiology                                  | 0.669 ± 0.013 |
| HP:0007768   | Central retinal vessel vascular tortuosity               | 0.667 ± 0.167 |
| HP:0003808   | Abnormal muscle tone                                     | 0.666 ± 0.016 |
| HP:0005522   | Pyridoxine-responsive sideroblastic anemia               | 0.665 ± 0.169 |
| HP:0000119   | Abnormality of the genitourinary system                  | 0.663 ± 0.010 |
| HP:0001112   | Leber optic atrophy                                      | 0.661 ± 0.229 |
| HP:0000576   | Centrocecal scotoma                                      | 0.660 ± 0.064 |
| HP:0012372   | Abnormal eye morphology                                  | 0.659 ± 0.013 |

|            |                                                         |               |
|------------|---------------------------------------------------------|---------------|
| HP:0010293 | Aplasia/Hypoplasia of the uvula                         | 0.657 ± 0.175 |
| HP:0040064 | Abnormality of limbs                                    | 0.651 ± 0.008 |
| HP:0100022 | Abnormality of movement                                 | 0.651 ± 0.008 |
| HP:0010979 | Abnormality of lipoprotein cholesterol concentration    | 0.648 ± 0.148 |
| HP:0012758 | Neurodevelopmental delay                                | 0.647 ± 0.018 |
| HP:0010980 | Hyperlipoproteinemia                                    | 0.640 ± 0.154 |
| HP:0000006 | Autosomal dominant inheritance                          | 0.640 ± 0.006 |
| HP:0007183 | Focal T2 hyperintense basal ganglia lesion              | 0.634 ± 0.086 |
| HP:0000929 | Abnormality of the skull                                | 0.633 ± 0.012 |
| HP:0010469 | Absent testis                                           | 0.628 ± 0.165 |
| HP:0004360 | Abnormality of acid-base homeostasis                    | 0.625 ± 0.047 |
| HP:0000153 | Abnormality of the mouth                                | 0.625 ± 0.017 |
| HP:0100547 | Abnormality of forebrain morphology                     | 0.624 ± 0.014 |
| HP:0000598 | Abnormality of the ear                                  | 0.623 ± 0.022 |
| HP:0002060 | Abnormality of the cerebrum                             | 0.622 ± 0.011 |
| HP:0012253 | Abnormal respiratory epithelium morphology              | 0.619 ± 0.135 |
| HP:0001941 | Acidosis                                                | 0.619 ± 0.041 |
| HP:0031816 | Abnormal oral morphology                                | 0.617 ± 0.016 |
| HP:0001249 | Intellectual disability                                 | 0.617 ± 0.012 |
| HP:0000163 | Abnormal oral cavity morphology                         | 0.617 ± 0.018 |
| HP:0000512 | Abnormal electroretinogram                              | 0.615 ± 0.043 |
| HP:0000951 | Abnormality of the skin                                 | 0.614 ± 0.018 |
| HP:0008155 | Mucopolysacchariduria                                   | 0.613 ± 0.251 |
| HP:0002151 | Increased serum lactate                                 | 0.611 ± 0.029 |
| HP:0005938 | Abnormal respiratory motile cilium morphology           | 0.610 ± 0.142 |
| HP:0012377 | Hemianopia                                              | 0.610 ± 0.110 |
| HP:0001252 | Muscular hypotonia                                      | 0.604 ± 0.019 |
| HP:0011442 | Abnormality of central motor function                   | 0.602 ± 0.013 |
| HP:0001250 | Seizures                                                | 0.601 ± 0.016 |
| HP:0002419 | Molar tooth sign on MRI                                 | 0.601 ± 0.144 |
| HP:0012736 | Profound global developmental delay                     | 0.599 ± 0.105 |
| HP:0001263 | Global developmental delay                              | 0.596 ± 0.019 |
| HP:0003541 | Urinary glycosaminoglycan excretion                     | 0.593 ± 0.275 |
| HP:0002977 | Aplasia/Hypoplasia involving the central nervous system | 0.593 ± 0.010 |
| HP:0011121 | Abnormality of skin morphology                          | 0.590 ± 0.017 |
| HP:0005339 | Abnormality of complement system                        | 0.589 ± 0.272 |
| HP:0012103 | Abnormality of the mitochondrion                        | 0.589 ± 0.071 |
| HP:0000662 | Nyctalopia                                              | 0.587 ± 0.055 |
| HP:0002715 | Abnormality of the immune system                        | 0.586 ± 0.012 |
| HP:0025032 | Abnormality of digestive system physiology              | 0.585 ± 0.021 |
| HP:0003287 | Abnormality of mitochondrial metabolism                 | 0.582 ± 0.066 |
| HP:0031703 | Abnormal ear morphology                                 | 0.582 ± 0.015 |
| HP:0001972 | Macrocytic anemia                                       | 0.581 ± 0.103 |
| HP:0011705 | First degree atrioventricular block                     | 0.581 ± 0.101 |
| HP:0012334 | Extrahepatic cholestasis                                | 0.580 ± 0.336 |
| HP:0003254 | Abnormality of DNA repair                               | 0.580 ± 0.256 |
| HP:0012751 | Abnormal basal ganglia MRI signal intensity             | 0.579 ± 0.073 |

|            |                                           |                   |
|------------|-------------------------------------------|-------------------|
| HP:0002490 | Increased CSF lactate                     | $0.578 \pm 0.063$ |
| HP:0030085 | Abnormal CSF lactate level                | $0.578 \pm 0.063$ |
| HP:0006744 | Adrenocortical carcinoma                  | $0.577 \pm 0.338$ |
| HP:0011844 | Abnormal appendicular skeleton morphology | $0.572 \pm 0.015$ |
| HP:0012251 | ST segment elevation                      | $0.570 \pm 0.102$ |
| HP:0031690 | Opportunistic infection                   | $0.570 \pm 0.264$ |
| HP:0011715 | Trifascicular block                       | $0.569 \pm 0.132$ |

Performance of DeepPheno by phenotypes (Top 100).
