# Supplementary material for: DeepPheno: Predicting single gene loss-of-function phenotypes using an ontology-aware hierarchical classifier
Source: PubMed Central journal article supplement (PMC7710064; doi:10.1371/journal.pcbi.1008453), 2020-11-18
Supplement: pcbi.1008453.s002.pdf [file pcbi.1008453.s002.pdf]

| Phenotype ID | Phenotype name                                       | $F_{\max}$        | Number of classes |
|--------------|------------------------------------------------------|-------------------|-------------------|
| HP:0000005   | Mode of inheritance                                  | $0.772 \pm 0.005$ | 14                |
| HP:0001263   | Global developmental delay                           | $0.579 \pm 0.024$ | 5                 |
| HP:0012759   | Neurodevelopmental abnormality                       | $0.565 \pm 0.010$ | 25                |
| HP:0004359   | Abnormal circulating fatty-acid concentration        | $0.553 \pm 0.119$ | 7                 |
| HP:0004360   | Abnormality of acid-base homeostasis                 | $0.540 \pm 0.034$ | 12                |
| HP:0001249   | Intellectual disability                              | $0.536 \pm 0.008$ | 6                 |
| HP:0001941   | Acidosis                                             | $0.526 \pm 0.028$ | 6                 |
| HP:0012758   | Neurodevelopmental delay                             | $0.522 \pm 0.015$ | 12                |
| HP:0001252   | Muscular hypotonia                                   | $0.520 \pm 0.019$ | 8                 |
| HP:0003808   | Abnormal muscle tone                                 | $0.516 \pm 0.012$ | 27                |
| HP:0010979   | Abnormality of lipoprotein cholesterol concentration | $0.504 \pm 0.154$ | 7                 |
| HP:0000556   | Retinal dystrophy                                    | $0.495 \pm 0.039$ | 5                 |
| HP:0012253   | Abnormal respiratory epithelium morphology           | $0.491 \pm 0.148$ | 5                 |
| HP:0012103   | Abnormality of the mitochondrion                     | $0.488 \pm 0.037$ | 10                |
| HP:0001507   | Growth abnormality                                   | $0.483 \pm 0.014$ | 40                |
| HP:0001250   | Seizures                                             | $0.482 \pm 0.011$ | 22                |
| HP:0000512   | Abnormal electroretinogram                           | $0.476 \pm 0.057$ | 6                 |
| HP:0011804   | Abnormal muscle physiology                           | $0.473 \pm 0.009$ | 93                |
| HP:0003287   | Abnormality of mitochondrial metabolism              | $0.470 \pm 0.024$ | 8                 |
| HP:0040195   | Decreased head circumference                         | $0.464 \pm 0.016$ | 5                 |
| HP:0000002   | Abnormality of body height                           | $0.461 \pm 0.010$ | 15                |
| HP:0030453   | Abnormal visual electrophysiology                    | $0.459 \pm 0.029$ | 8                 |
| HP:0031704   | Abnormal ear physiology                              | $0.457 \pm 0.016$ | 13                |
| HP:0000240   | Abnormality of skull size                            | $0.456 \pm 0.014$ | 9                 |
| HP:0012547   | Abnormal involuntary eye movements                   | $0.455 \pm 0.023$ | 6                 |
| HP:0001510   | Growth delay                                         | $0.455 \pm 0.013$ | 15                |
| HP:0012345   | Abnormal glycosylation                               | $0.455 \pm 0.161$ | 5                 |
| HP:0004308   | Ventricular arrhythmia                               | $0.449 \pm 0.069$ | 5                 |
| HP:0000364   | Hearing abnormality                                  | $0.444 \pm 0.016$ | 12                |
| HP:0000707   | Abnormality of the nervous system                    | $0.444 \pm 0.004$ | 649               |
| HP:0000639   | Nystagmus                                            | $0.443 \pm 0.025$ | 5                 |
| HP:0000598   | Abnormality of the ear                               | $0.439 \pm 0.008$ | 67                |
| HP:0100547   | Abnormality of forebrain morphology                  | $0.437 \pm 0.011$ | 72                |
| HP:0000478   | Abnormality of the eye                               | $0.436 \pm 0.009$ | 254               |
| HP:0012638   | Abnormality of nervous system physiology             | $0.433 \pm 0.006$ | 358               |
| HP:0004322   | Short stature                                        | $0.432 \pm 0.008$ | 10                |
| HP:0003011   | Abnormality of the musculature                       | $0.432 \pm 0.007$ | 208               |
| HP:0005115   | Supraventricular arrhythmia                          | $0.430 \pm 0.107$ | 6                 |
| HP:0007364   | Aplasia/Hypoplasia of the cerebrum                   | $0.428 \pm 0.015$ | 13                |

|            |                                                         |                   |      |
|------------|---------------------------------------------------------|-------------------|------|
| HP:0012373 | Abnormal eye physiology                                 | $0.426 \pm 0.010$ | 101  |
| HP:0012639 | Abnormality of nervous system morphology                | $0.426 \pm 0.004$ | 293  |
| HP:0000496 | Abnormality of eye movement                             | $0.425 \pm 0.012$ | 32   |
| HP:0002011 | Morphological abnormality of the central nervous system | $0.423 \pm 0.005$ | 229  |
| HP:0002977 | Aplasia/Hypoplasia involving the central nervous system | $0.422 \pm 0.013$ | 28   |
| HP:0000365 | Hearing impairment                                      | $0.422 \pm 0.017$ | 9    |
| HP:0000152 | Abnormality of head or neck                             | $0.418 \pm 0.007$ | 449  |
| HP:0000118 | Phenotypic abnormality                                  | $0.416 \pm 0.004$ | 3740 |
| HP:0004323 | Abnormality of body weight                              | $0.416 \pm 0.017$ | 15   |
| HP:0012443 | Abnormality of brain morphology                         | $0.412 \pm 0.005$ | 150  |
| HP:0002060 | Abnormality of the cerebrum                             | $0.410 \pm 0.011$ | 64   |
| HP:0100691 | Abnormality of the curvature of the cornea              | $0.410 \pm 0.050$ | 5    |
| HP:0000035 | Abnormal testis morphology                              | $0.407 \pm 0.012$ | 16   |
| HP:0000234 | Abnormality of the head                                 | $0.406 \pm 0.008$ | 435  |
| HP:0000929 | Abnormality of the skull                                | $0.406 \pm 0.014$ | 92   |
| HP:0040215 | Abnormal circulating insulin level                      | $0.403 \pm 0.053$ | 5    |
| HP:0009121 | Abnormal axial skeleton morphology                      | $0.403 \pm 0.011$ | 197  |
| HP:0008669 | Abnormal spermatogenesis                                | $0.402 \pm 0.025$ | 5    |
| HP:0009116 | Aplasia/Hypoplasia involving bones of the skull         | $0.400 \pm 0.023$ | 7    |
| HP:0040214 | Abnormal insulin level                                  | $0.400 \pm 0.060$ | 6    |
| HP:0012372 | Abnormal eye morphology                                 | $0.396 \pm 0.011$ | 164  |
| HP:0100699 | Scarring                                                | $0.396 \pm 0.035$ | 5    |
| HP:0011442 | Abnormality of central motor function                   | $0.396 \pm 0.009$ | 69   |
| HP:0004325 | Decreased body weight                                   | $0.395 \pm 0.020$ | 8    |
| HP:0001276 | Hypertonia                                              | $0.395 \pm 0.012$ | 17   |
| HP:0002733 | Abnormality of the lymph nodes                          | $0.394 \pm 0.064$ | 5    |
| HP:0004329 | Abnormal posterior eye segment morphology               | $0.394 \pm 0.017$ | 73   |
| HP:0011446 | Abnormality of higher mental function                   | $0.393 \pm 0.009$ | 39   |
| HP:0000315 | Abnormality of the orbital region                       | $0.392 \pm 0.021$ | 61   |
| HP:0000517 | Abnormality of the lens                                 | $0.392 \pm 0.021$ | 11   |
| HP:0010442 | Polydactyly                                             | $0.391 \pm 0.076$ | 10   |
| HP:0002650 | Scoliosis                                               | $0.391 \pm 0.019$ | 5    |
| HP:0030791 | Abnormal jaw morphology                                 | $0.390 \pm 0.020$ | 12   |
| HP:0000846 | Adrenal insufficiency                                   | $0.389 \pm 0.056$ | 5    |
| HP:0001637 | Abnormal myocardium morphology                          | $0.389 \pm 0.012$ | 8    |
| HP:0003119 | Abnormal circulating lipid concentration                | $0.389 \pm 0.051$ | 20   |
| HP:0003107 | Abnormal circulating cholesterol concentration          | $0.387 \pm 0.027$ | 10   |

|            |                                                        |               |     |
|------------|--------------------------------------------------------|---------------|-----|
| HP:0000119 | Abnormality of the genitourinary system                | 0.387 ± 0.012 | 294 |
| HP:0001939 | Abnormality of metabolism/homeostasis                  | 0.387 ± 0.011 | 257 |
| HP:0010461 | Abnormality of the male genitalia                      | 0.386 ± 0.011 | 49  |
| HP:0012072 | Aciduria                                               | 0.385 ± 0.039 | 10  |
| HP:0000078 | Abnormality of the genital system                      | 0.385 ± 0.012 | 148 |
| HP:0000271 | Abnormality of the face                                | 0.384 ± 0.006 | 336 |
| HP:0025031 | Abnormality of the digestive system                    | 0.383 ± 0.014 | 221 |
| HP:0030956 | Abnormality of cardiovascular system electrophysiology | 0.383 ± 0.063 | 38  |
| HP:0011675 | Arrhythmia                                             | 0.383 ± 0.065 | 22  |
| HP:0000277 | Abnormality of the mandible                            | 0.382 ± 0.019 | 9   |
| HP:0011821 | Abnormality of facial skeleton                         | 0.382 ± 0.015 | 27  |
| HP:0000153 | Abnormality of the mouth                               | 0.381 ± 0.004 | 150 |
| HP:0000504 | Abnormality of vision                                  | 0.381 ± 0.011 | 29  |
| HP:0031703 | Abnormal ear morphology                                | 0.381 ± 0.008 | 60  |
| HP:0001123 | Visual field defect                                    | 0.381 ± 0.040 | 7   |
| HP:0000924 | Abnormality of the skeletal system                     | 0.381 ± 0.006 | 631 |
| HP:0025032 | Abnormality of digestive system physiology             | 0.380 ± 0.017 | 57  |
| HP:0011733 | Abnormality of adrenal physiology                      | 0.380 ± 0.031 | 9   |
| HP:0011443 | Abnormality of coordination                            | 0.379 ± 0.025 | 20  |
| HP:0000811 | Abnormal external genitalia                            | 0.378 ± 0.011 | 62  |
| HP:0001098 | Abnormal fundus morphology                             | 0.378 ± 0.016 | 69  |
| HP:0012243 | Abnormal reproductive system morphology                | 0.377 ± 0.010 | 119 |
| HP:0100022 | Abnormality of movement                                | 0.376 ± 0.010 | 84  |
| HP:0000366 | Abnormality of the nose                                | 0.376 ± 0.008 | 54  |

HPO branches with significantly better performance (Top 100)
