# Supplementary material for: DeepPheno: Predicting single gene loss-of-function phenotypes using an ontology-aware hierarchical classifier
Source: PubMed Central journal article supplement (PMC7710064; doi:10.1371/journal.pcbi.1008453), 2020-11-18
Supplement: pcbi.1008453.s003.pdf [file pcbi.1008453.s003.pdf]

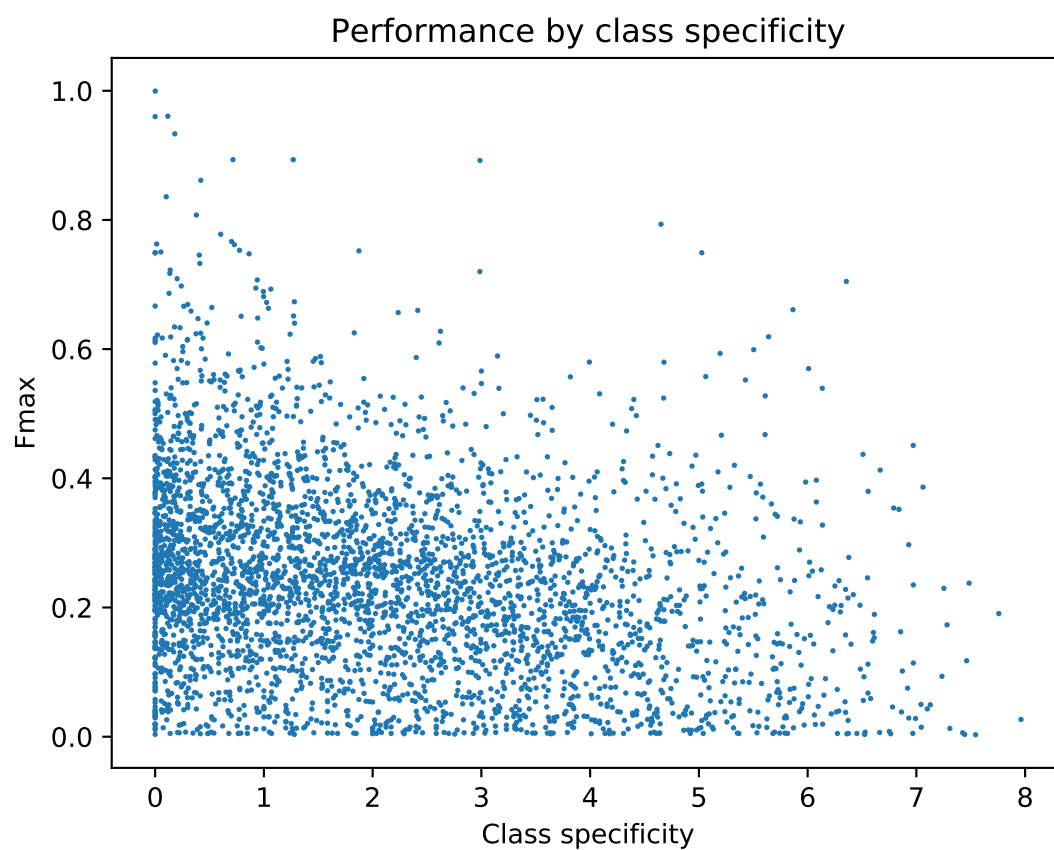

Performance of each phenotype class by its specificity measure based on the number of annotations.
